# Supplementary material for: Academic User View: Organ-on-a-Chip Technology
Source: Biosensors (Basel). 2022 Feb 16;12(2):126. doi: 10.3390/bios12020126 (PMC8869899; doi:10.3390/bios12020126)
Supplement: Supplementary file 1 [file biosensors-12-00126-s001.zip › Table S1.xlsx]

## Sheet: Microfluidics and Organs-on-a-C
NR
